# Supplementary material for: Characterization of pitch carbon coating properties affecting the electrochemical behavior of silicon nanoparticle lithium-ion battery anodes
Source: Royal Society of Chemistry journal article supplement (doi:10.1039/d4ta04478a), 2024-01-01
Supplement: d4ta04478a1.pdf [file d4ta04478a1.pdf]

## Supporting Information

### **Characterization of Pitch Carbon Coating Properties Affecting the Electrochemical Behavior of Silicon Nanoparticle Lithium-ion Battery Anodes**

Zoey Huey,<sup>a,b</sup> Maxwell C. Schulze,<sup>a</sup> G. Michael Carroll,<sup>a</sup> Chaiwat Engtrakul,<sup>a</sup> Chun-Sheng Jiang,<sup>a</sup> Steven C. DeCaluwe,<sup>b</sup> Bertrand J. Tremolet de Villers,<sup>a,\*</sup> and Sang-Don Han<sup>a,c,\*</sup>

<sup>a</sup> Materials, Chemical, and Computational Science Directorate, National Renewable Energy Laboratory, Golden, Colorado 80401, United States

<sup>b</sup> Department of Mechanical Engineering, Colorado School of Mines, Golden, Colorado 80401, United States

<sup>c</sup> Department of Chemistry, Sejong University, Seoul, 05006, Republic of Korea

E-mails: shan@sejong.ac.kr, bertrand.tremolet@nrel.gov

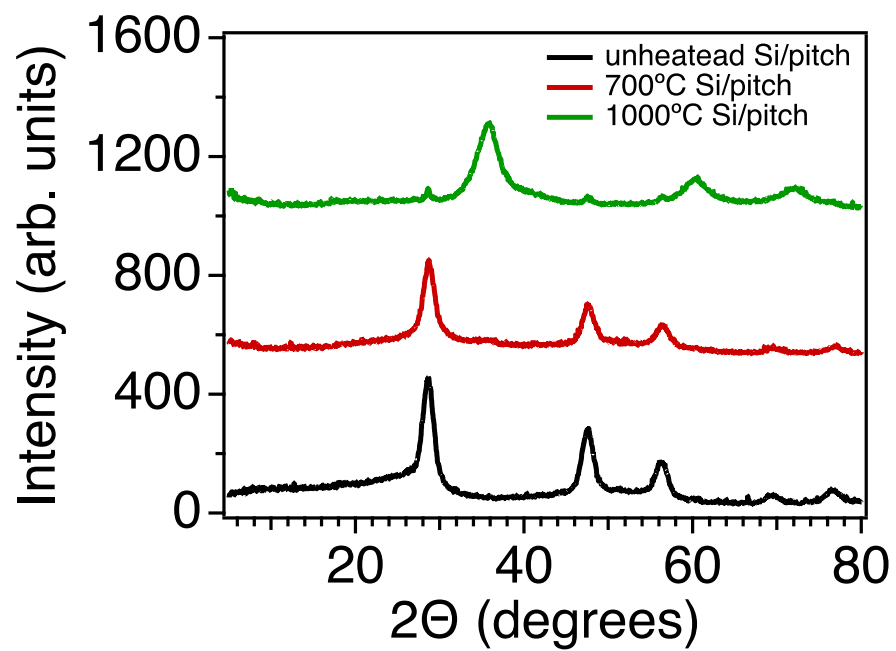

**Figure S1.** X-ray diffraction patterns of Si/pitch powders.

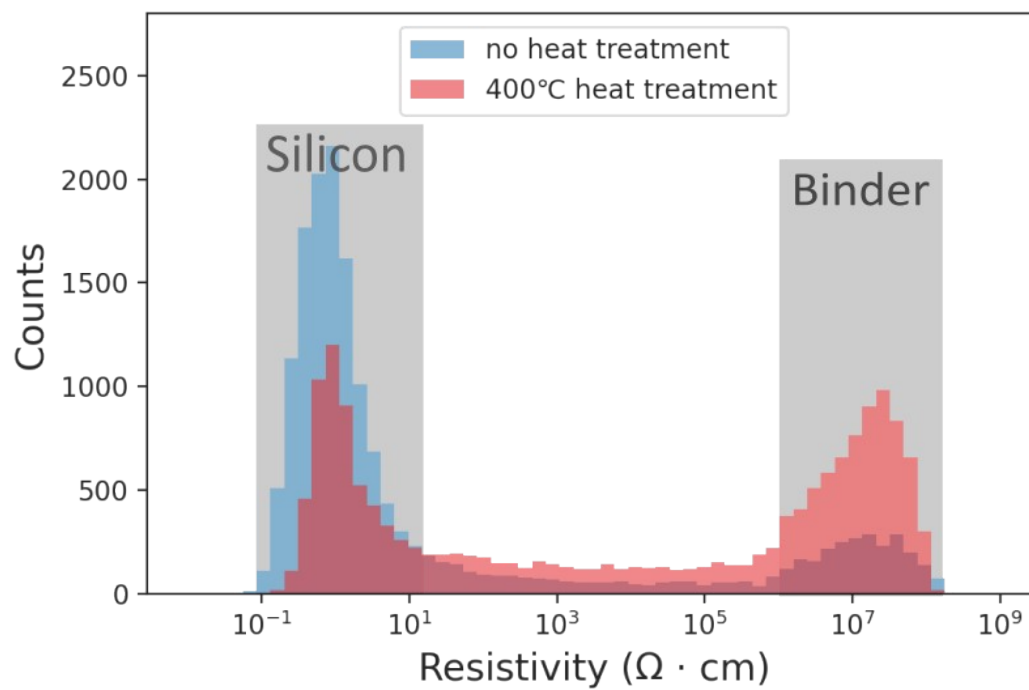

**Figure S2.** Resistivity map histograms for un-heated and 400°C heat treated Si-only electrodes showing consistent resistivities for the Si and the binder.

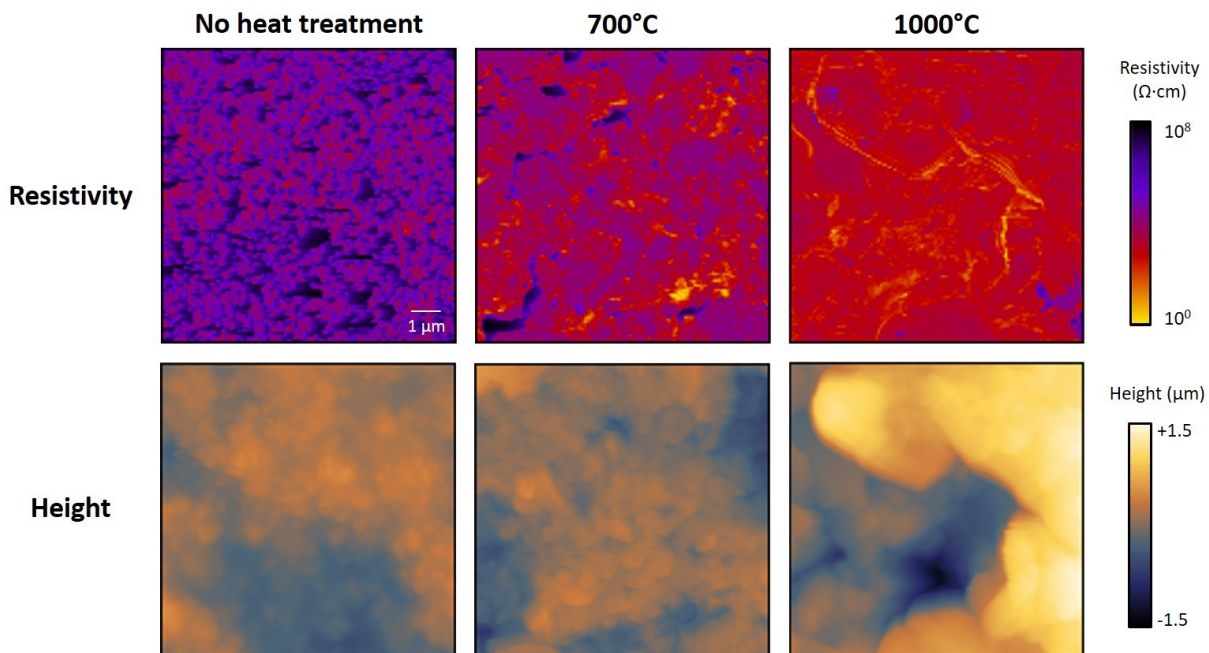

**Figure S3.** Electronic resistivity and morphology of pristine pitch electrodes upon thermal annealing.

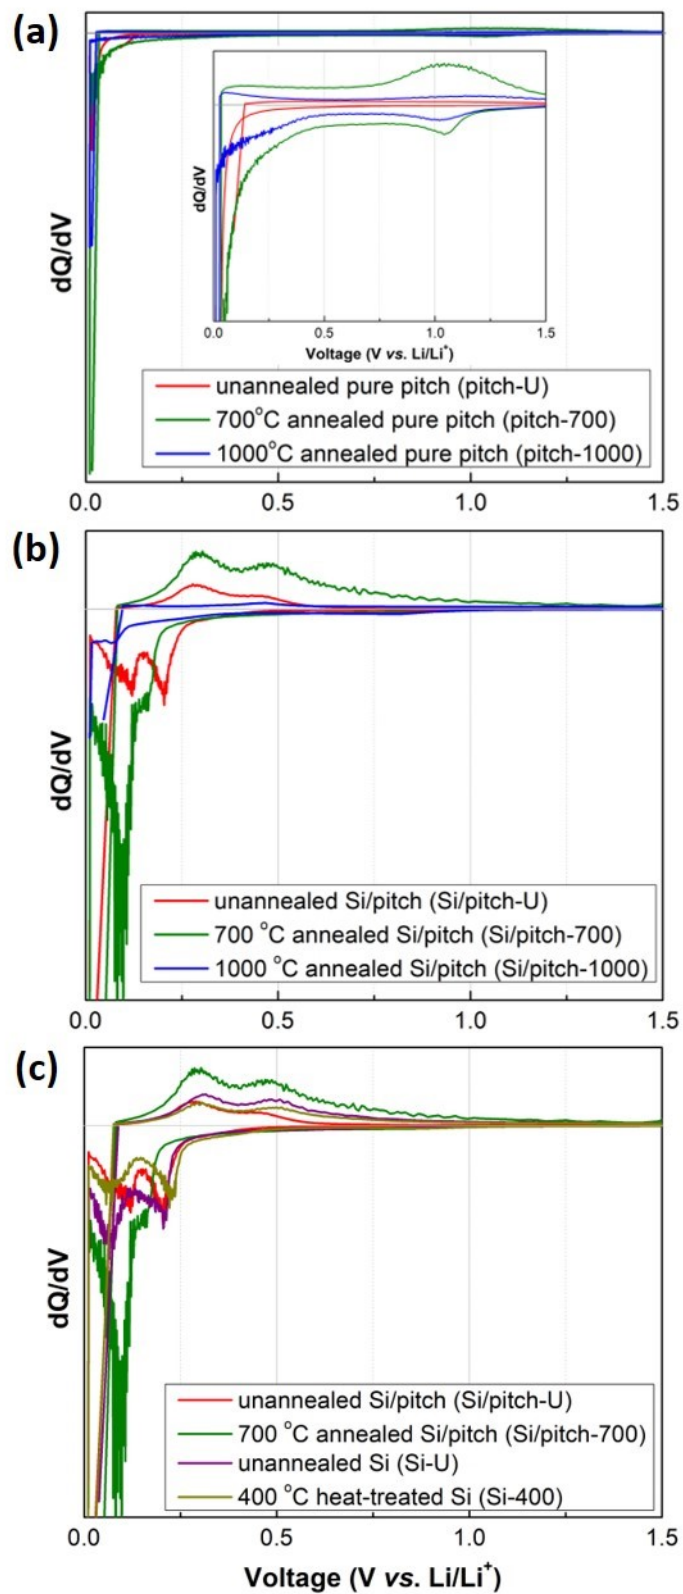

**Figure S4.** Differential capacity plots of (a) pure pitch, (b) Si/pitch and (c) Si electrodes upon thermal annealing.

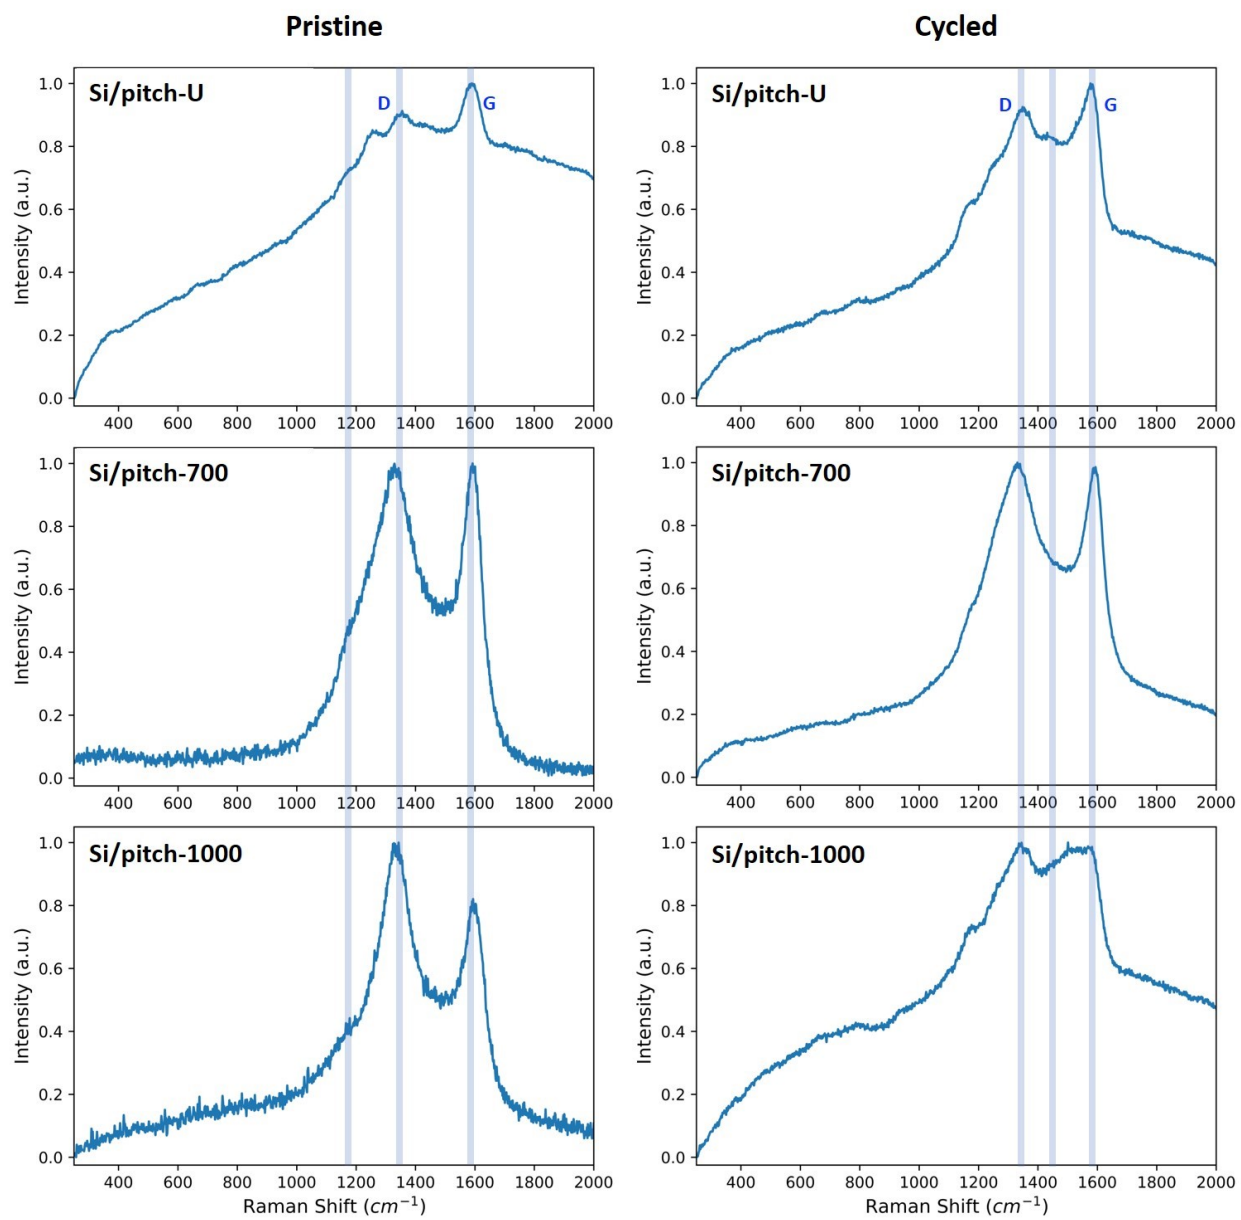

**Figure S5.** Raman spectra of Si/pitch electrodes upon electrochemical cycling.

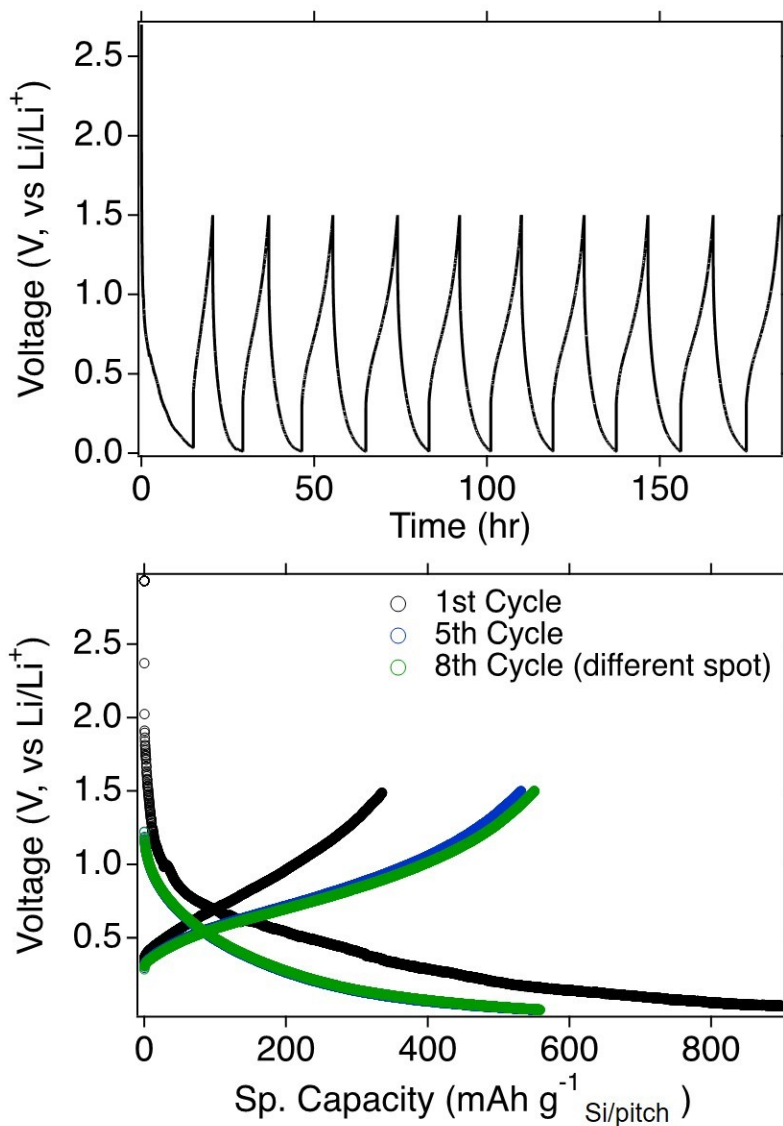

**Figure S6.** Electrochemical behaviors of the in-situ windowed coin cells with Si/pitch electrodes (vs. a Li metal reference/counter electrode).
